# Supplementary material
Source: PubMed Central journal article supplement (PMC4988809)

## Supplementary material

### **SPATA7: Evolving Phenotype from Cone-Rod Dystrophy to Retinitis Pigmentosa**

Matsui, McGuigan, Gruzensky, Aleman, Schwartz, Sumaroka, Koenekoop, Cideciyan & Jacobson

**Supplementary Table 1.** Retinal disease genes sequenced using Illumina HiSeq 2000 (Wang et al., 2013)

|          |         |              |         |          |
|----------|---------|--------------|---------|----------|
| ABCA4    | CHM     | IDH3B        | PAX2    | RP2      |
| ABCC6    | CLN3    | IMPDH1       | PCDH15  | RP9      |
| ADAM9    | CLRN1   | INPP5E       | PDE6A   | RPE65    |
| AHI1     | CNGA1   | INVS         | PDE6B   | RPGR     |
| AIPL1    | CNGA3   | IQCB1        | PDE6C   | RPGRIP1  |
| ALMS1    | CNGB1   | JAG1         | PDZD7   | RPGRIP1L |
| ARL6     | CNGB3   | KCNJ13       | PEX1    | RS1      |
| ARMS2    | CNNM4   | KCNV2        | PEX2    | SAG      |
| ATXN7    | COL11A1 | KLHL7        | PEX7    | SEMA4A   |
| BBS1     | COL2A1  | LCA5         | PGK1    | SNRNP200 |
| BBS10    | COL9A1  | LRAT         | PHYH    | SPATA7   |
| BBS12    | CRB1    | LRP5         | PITPNM3 | TEAD1    |
| BBS2     | CRX     | MERTK        | PRCD    | TIMM8A   |
| BBS4     | CYP4V2  | MFRP:C1QTNF5 | PROM1   | TIMP3    |
| BBS5     | DFNB31  | MKKS         | PRPF3   | TLR3     |
| BBS7     | DMD     | MTTP         | PRPF31  | TLR4     |
| BBS9     | EFEMP1  | MYO7A        | PRPF8   | TMEM126A |
| BEST1    | ELOVL4  | NDP          | PRPH2   | TOPORS   |
| C2       | ERCC6   | NPHP1        | RAX2    | TREX1    |
| C2ORF71  | EYS     | NPHP3        | RB1     | TRIM32   |
| C3       | FBLN5   | NPHP4        | RBP3    | TRPM1    |
| CA4      | FSCN2   | NR2E3        | RBP4    | TSPAN12  |
| CABP4    | FZD4    | NRL          | RD3     | TTC8     |
| CACNA1F  | GNAT1   | NYX          | RDH12   | TTPA     |
| CACNA2D4 | GNAT2   | OAT          | RDH5    | TULP1    |
| CC2D2A   | GPR98   | OFD1         | RGR     | UNC119   |
| CDH23    | GRK1    | OPA1         | RGS9    | USH1C    |
| CDH3     | GRM6    | OPA3         | RGS9BP  | USH1G    |
| CDHR1    | GUCA1A  | OPN1LW       | RHO     | USH2A    |
| CEP290   | GUCA1B  | OPN1MW       | RIMS1   | VCAN     |
| CERKL    | GUCY2D  | OPN1SW       | RLBP1   | WFS1     |
| CFB      | HMCN1   | OTX2         | ROM1    |          |
| CFH      | HTRA1   | PANK2        | RP1     |          |

**SPATA7: Evolving Phenotype from Cone-Rod Dystrophy to Retinitis Pigmentosa**  
Matsui, McGuigan, Gruzensky, Aleman, Schwartz, Sumaroka, Koenekoop, Cideciyan & Jacobson

**Supplementary Figure 1.** Published, disease-associated *SPATA7* gene exonic (below the diagram) and intronic (above the diagram) mutations on a scheme of the genomic structure. Numbers indicate exons. Black box indicates the mutation identified in the reported patient.

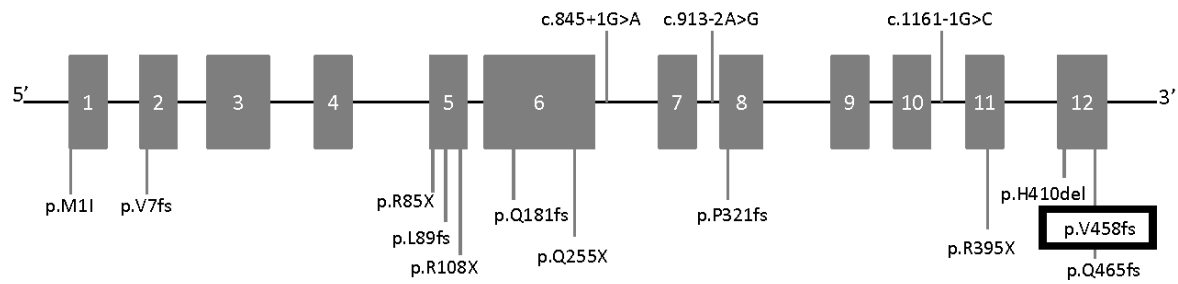

Supplement: NIHMS809698-supplement-Supplementary_Material.pdf [file NIHMS809698-supplement-Supplementary_Material.pdf]
